# Supplementary material for: Cytokine profiling in pulmonary arterial hypertension: the role of redox homeostasis and sex
Source: PubMed Central journal article supplement — Transl Res. Author manuscript; Available in PMC 2023 Mar 30. (PMC10062382; doi:10.1016/j.trsl.2022.03.013), 2022-04-09
Supplement: NIHMS1882602-supplement-1.pdf [file NIHMS1882602-supplement-1.pdf]

1  
2  
3  
4  
5  
6  
7  
8  
9  
10  
11  
12  
13  
14  
15  
16  
17  
18  
19  
20  
21  
22  
23  
24  
25  
26  
27  
28  
29  
30  
31  
32  
33  
34  
35  
36  
37  
38  
39  
40  
41  
42  
43  
44  
45  
46  
47  
48  
49  
50  
51  
52  
53  
54  
55  
56  
57  
58  
59  
60  
61  
62  
63  
64  
65

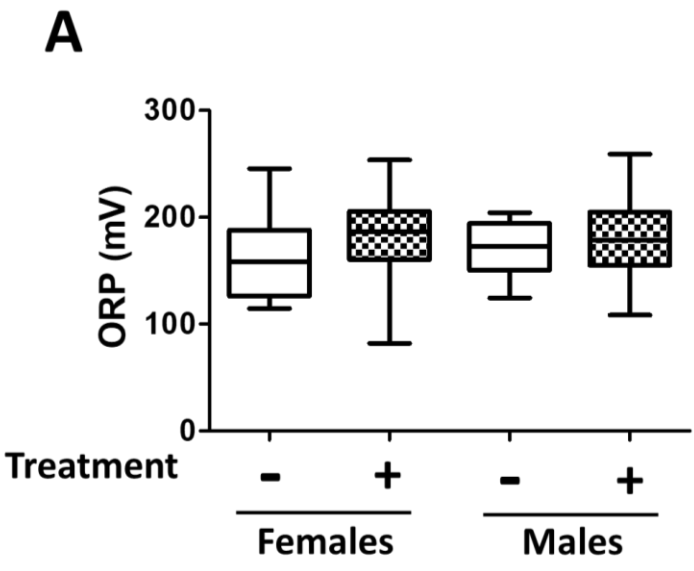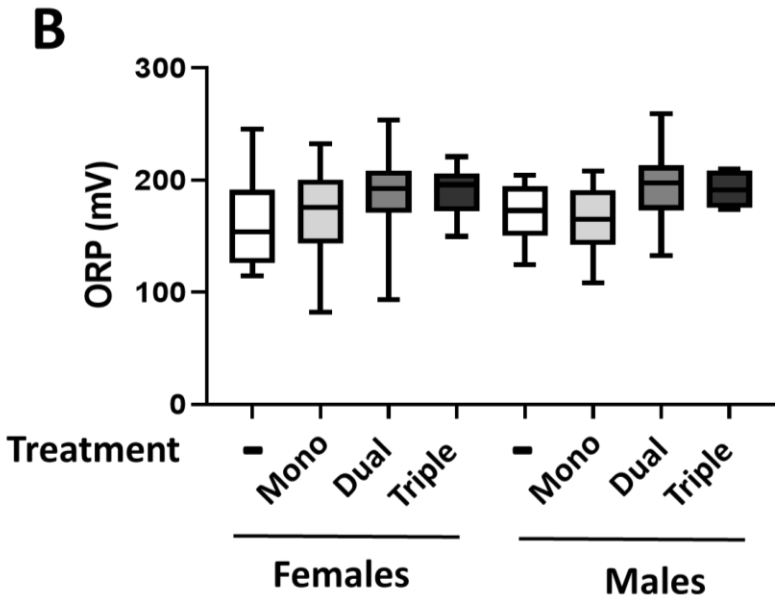

1  
2  
3  
4 **Supplemental Figure 1. Effect of PAH therapy on ORP values in male and female PAH**  
5  
6 **patients.**  
7

8  
9  
10 The plasma ORP values were compared between treatment-naïve patients and patients on PAH-  
11 specific therapies. PAH therapy produced no effect on plasma redox status in male or female  
12 patient cohorts, regardless of whether all treatment options were analyzed together (**A**) or  
13 separately (**B**). The data are presented as boxplots; whiskers show min to max values. Treatment-  
14 naïve females - N=26; total females on therapy - N= 73; females on monotherapy – 31; females  
15 on dual therapy – 32; females on triple therapy – 10. Treatment-naïve males - N=12; total males  
16 on therapy - N= 29; males on monotherapy – 13; males on dual therapy – 12; males on triple  
17 therapy – 4.  
18  
19  
20  
21  
22  
23  
24  
25  
26  
27  
28  
29  
30  
31  
32  
33  
34  
35  
36  
37  
38  
39  
40  
41  
42  
43  
44  
45  
46  
47  
48  
49  
50  
51  
52  
53  
54  
55  
56  
57  
58  
59  
60  
61  
62  
63  
64  
65

Supplemental Figure 2

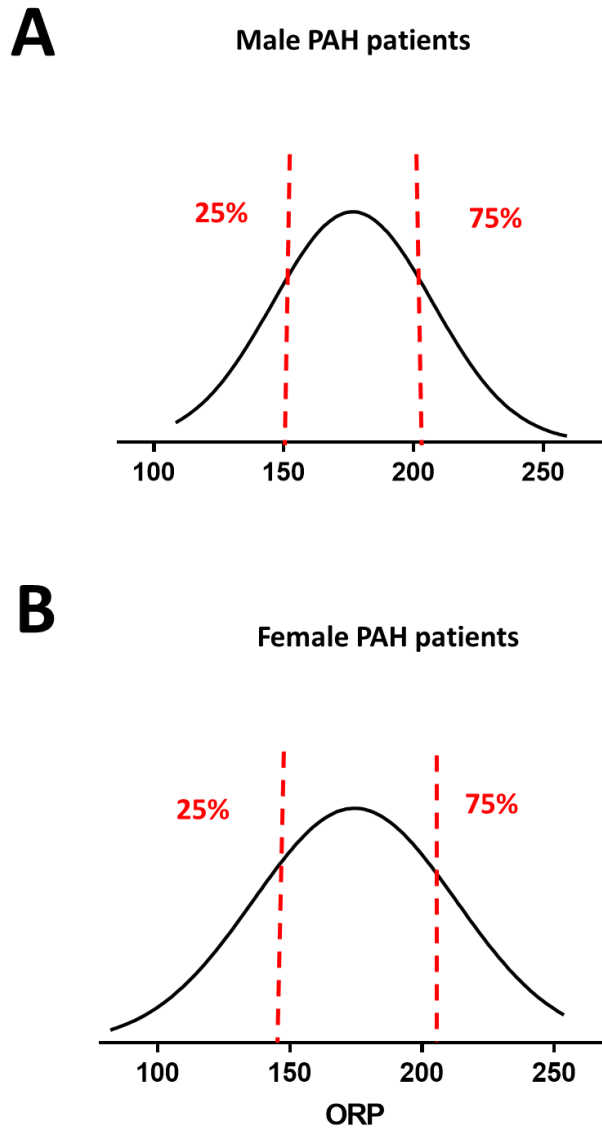

**Supplemental Figure 2. ORP distribution in male and female PAH patients.**

ORP analyzed in male (N=41) and female (N=100) PAH patient cohorts revealed normal and equal distribution in both sexes.

Supplemental Figure 3

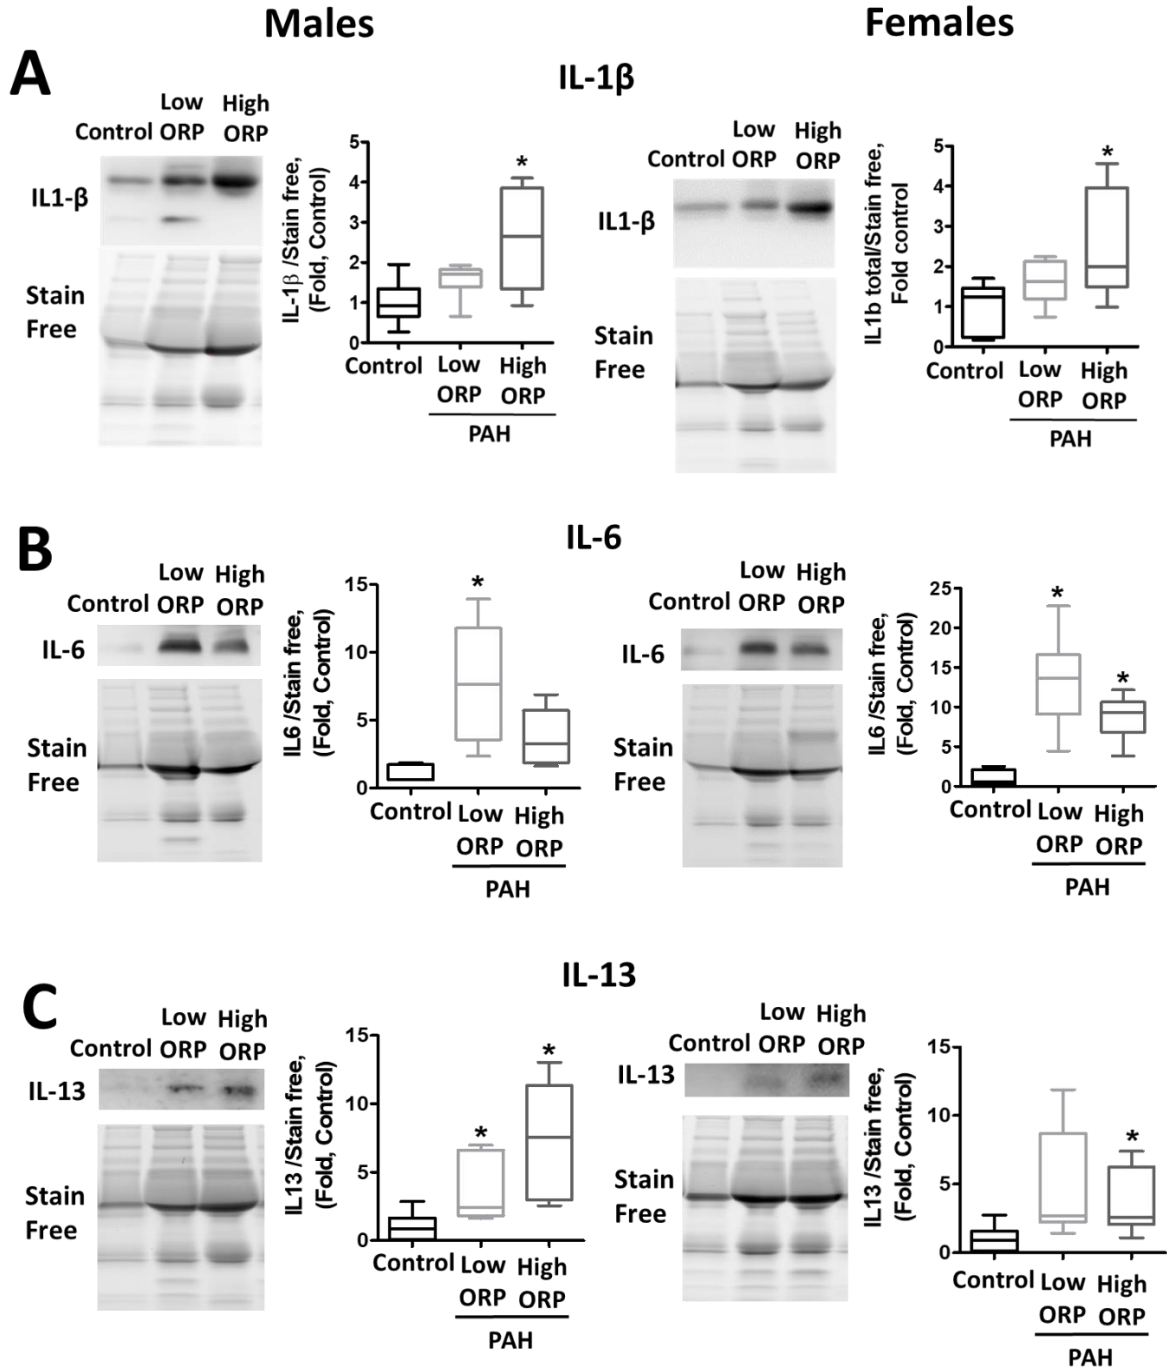

1  
2  
3  
4 **Supplemental Figure 3. Analysis of ORP-dependent cytokines by immunoblotting.**  
5

6  
7 Three cytokines were selected as representatives for each group - 1) cytokines that similarly  
8 upregulate in male and female samples with high plasma ORP (IL1 $\beta$ , **A**); 2) cytokines that  
9 precisely elevates in the low ORP samples in males (IL-6, **B**); and 3) cytokines that elevate  
10 explicitly in the high ORP samples in females (IL-13, **C**) were analyzed by Western blot analysis.  
11  
12 The data confirm the results obtained by multiplex assay. IL-6 in females and IL-13 do not show  
13 redox sensitivity (significantly elevated in Low- and High-ORP groups). The rest of the cytokines  
14 specifically upregulate in only one redox condition. The data are presented as boxplots; whiskers  
15 are showing min to max values. \*indicate significance ( $p < 0.05$ ) between Control and PAH  
16 subjects; N=6-7 in all groups.  
17  
18  
19  
20  
21  
22  
23  
24  
25  
26  
27  
28  
29  
30  
31  
32  
33  
34  
35  
36  
37  
38  
39  
40  
41  
42  
43  
44  
45  
46  
47  
48  
49  
50  
51  
52  
53  
54  
55  
56  
57  
58  
59  
60  
61  
62  
63  
64  
65
